# Supplementary material for: Study on the Potential Distribution of Leptinotarsa decemlineata and Its Natural Enemy Picromerus bidens Under Climate Change
Source: Frontiers journal article supplement (doi:10.3389/fevo.2021.786436), 2022-01-14
Supplement: Presentation_1.pdf [file Presentation_1.pdf]

SSP245:2021-2040

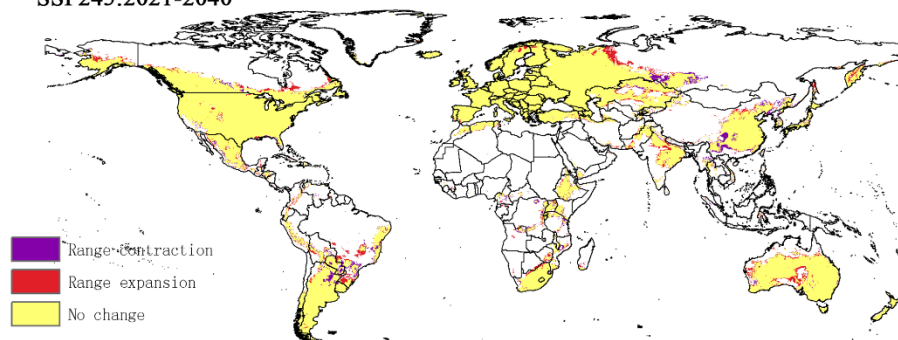

SSP245:2041-2060

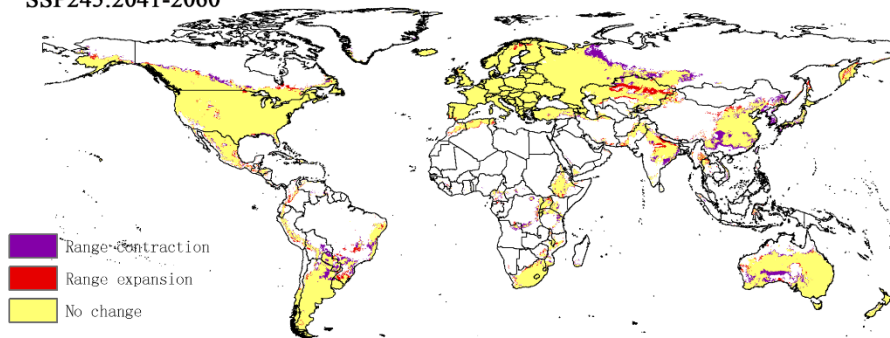

SSP245:2061-2080

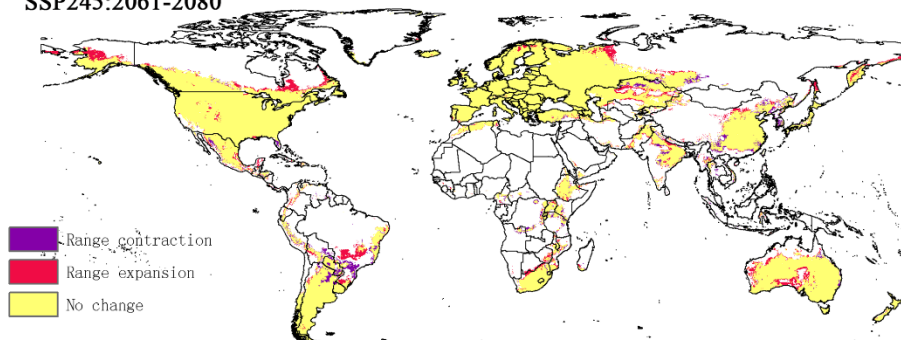

SSP245:2081-2100

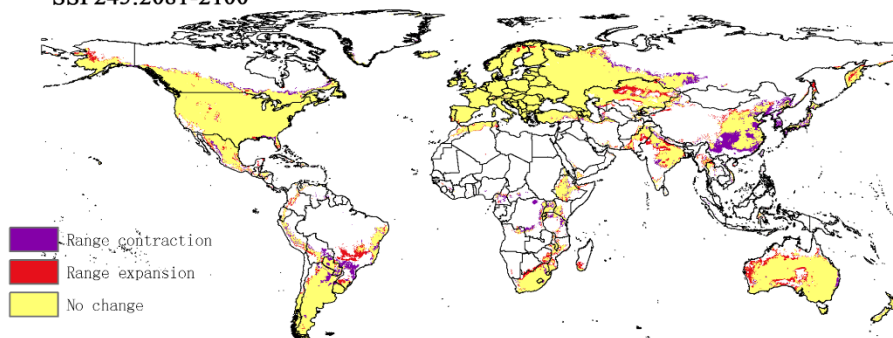

Supplementary Figure 1 The change of suitable distribution area of CPB under SSP245 climate scenario

SSP370:2021-2040

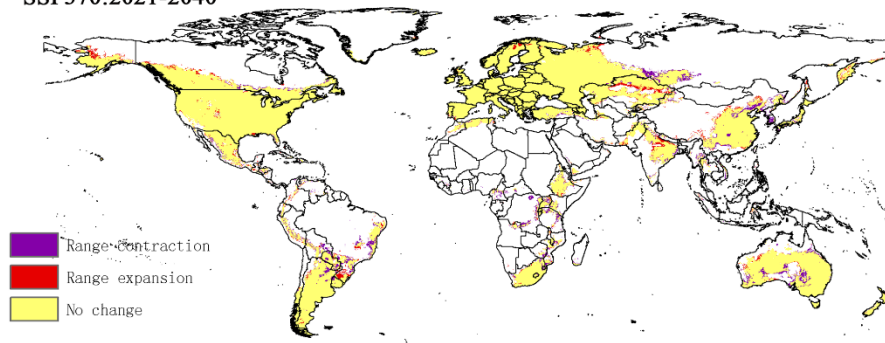

SSP370:2041-2060

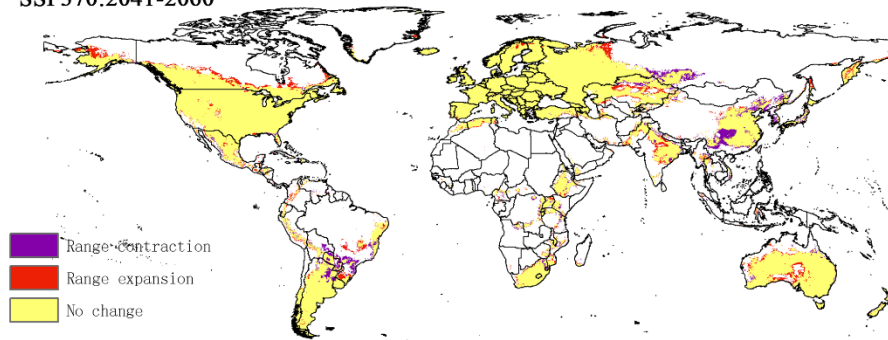

SSP370:2061-2080

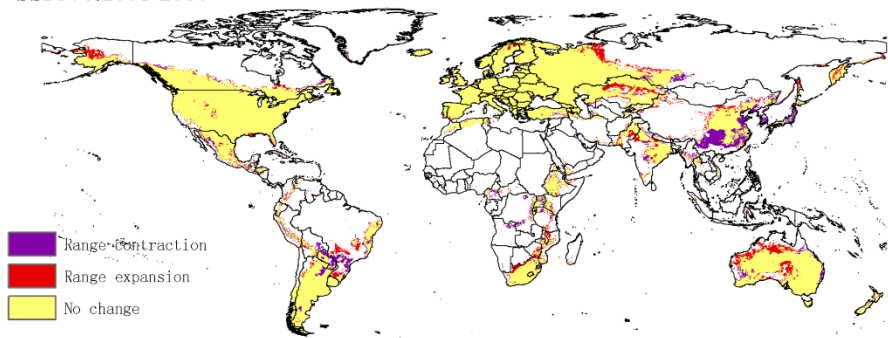

SSP370:2081-2100

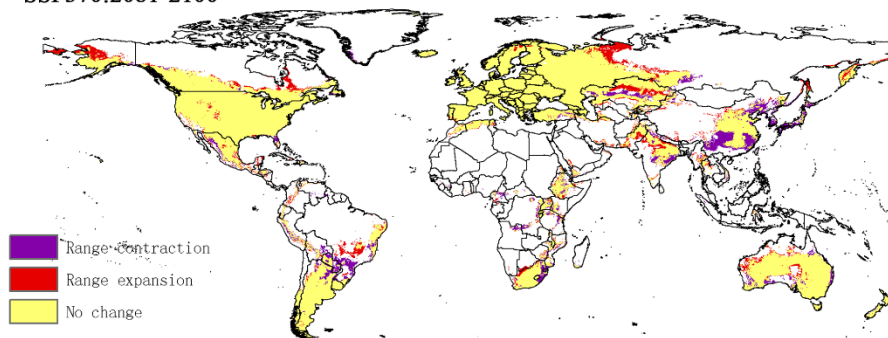

Supplementary Figure 2 The change of suitable distribution area of CPB under SSP370 climate scenario

SSP585:2021-2040

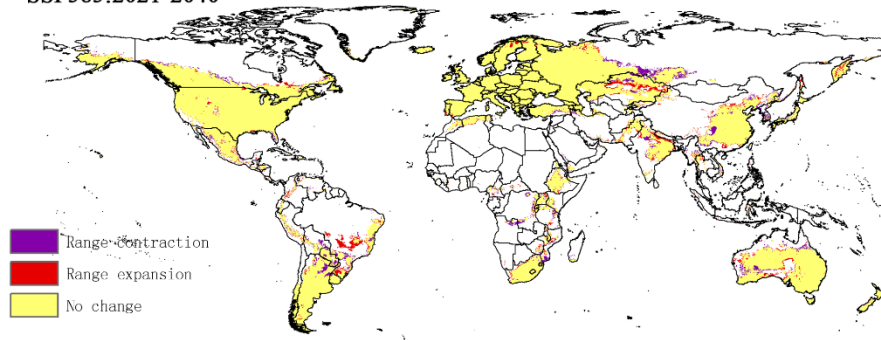

SSP585:2041-2060

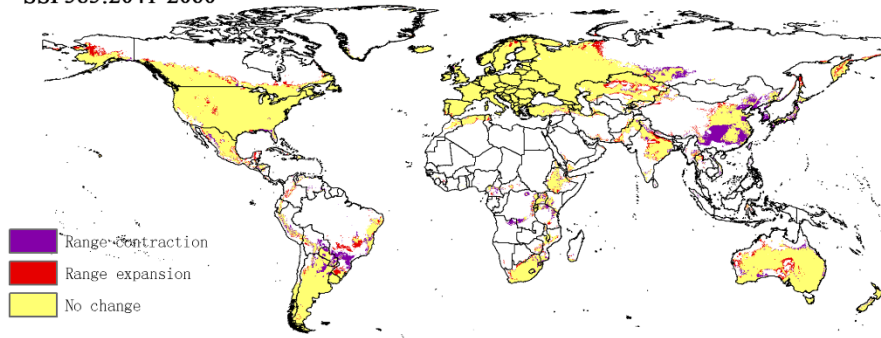

SSP585:2061-2080

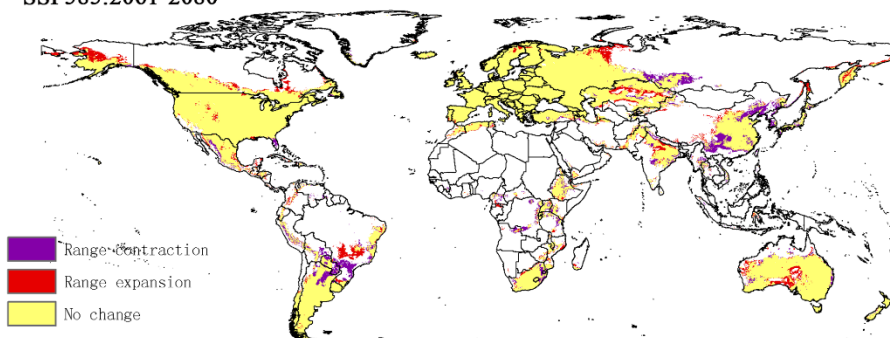

SSP585:2081-2100

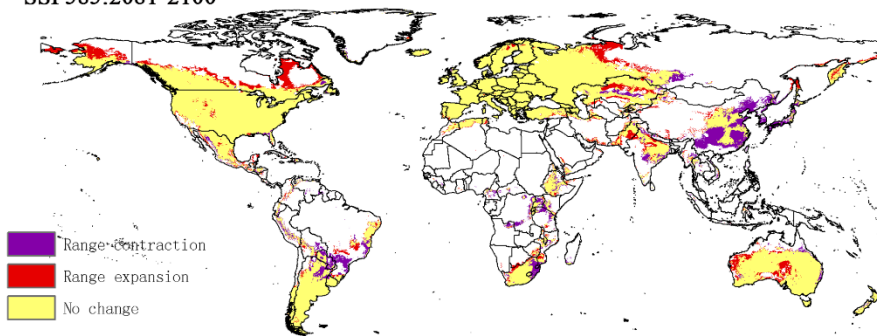

Supplementary Figure 3 The change of suitable distribution area of CPB under SSP585 climate scenario

SSP245:2021-2040

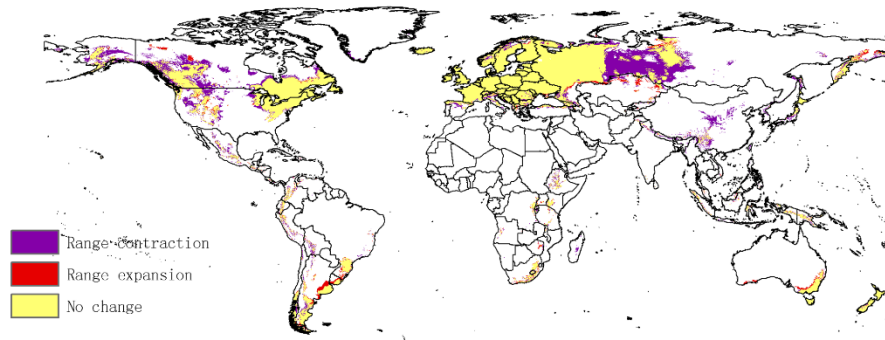

SSP245:2041-2060

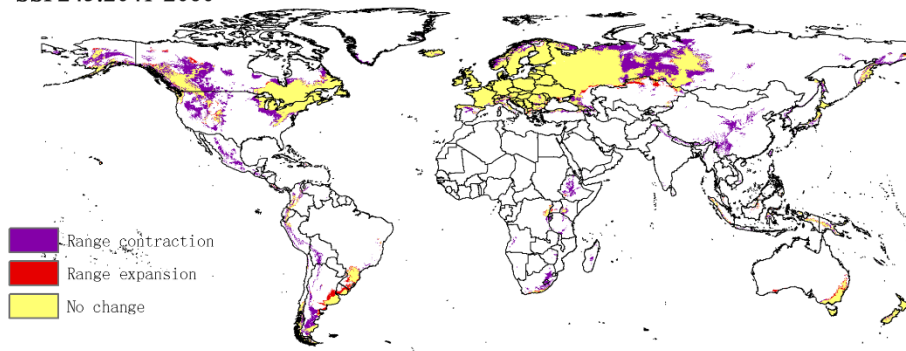

SSP245:2061-2080

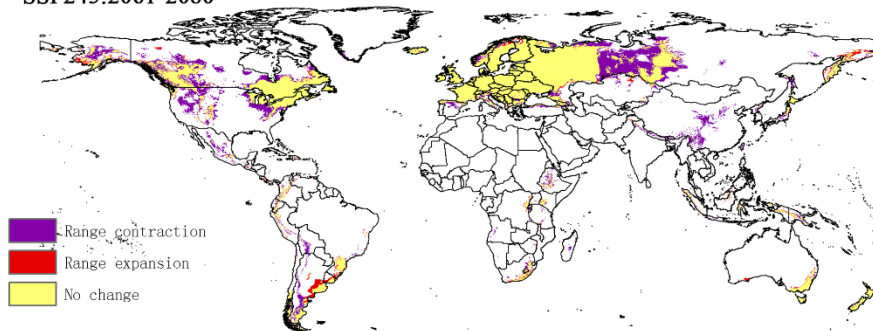

SSP245:2081-2100

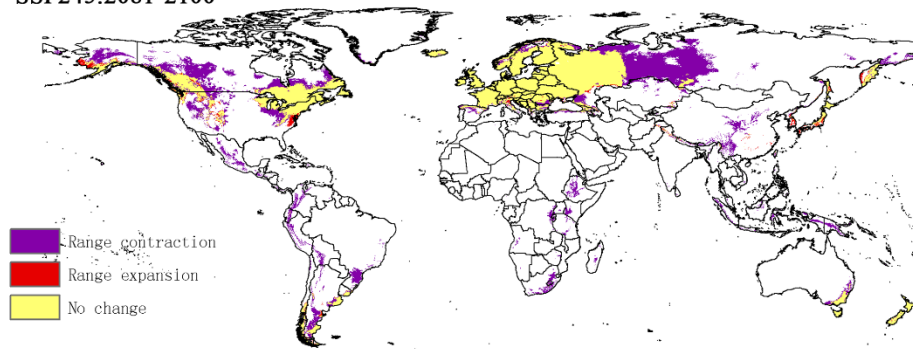

Supplementary Figure 4 The change of suitable distribution area of *P. bidens* under SSP245 climate scenario



**SSP370:2021-2040**

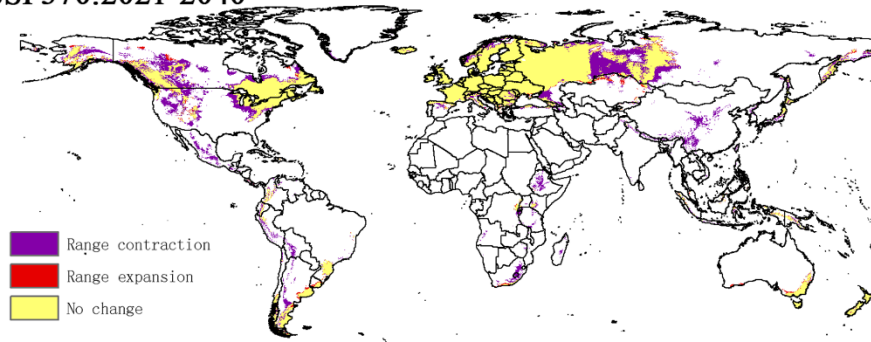

**SSP370:2041-2060**

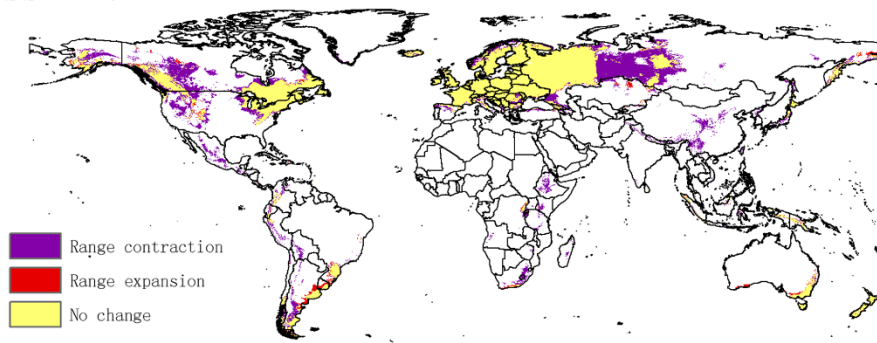

**SSP370:2061-2080**

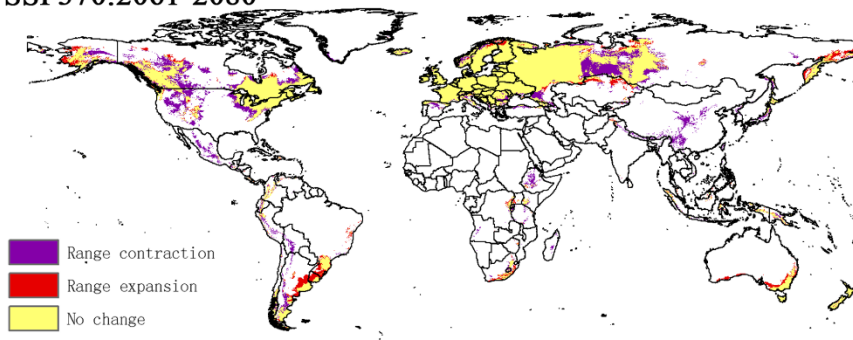

**SSP370:2081-2100**

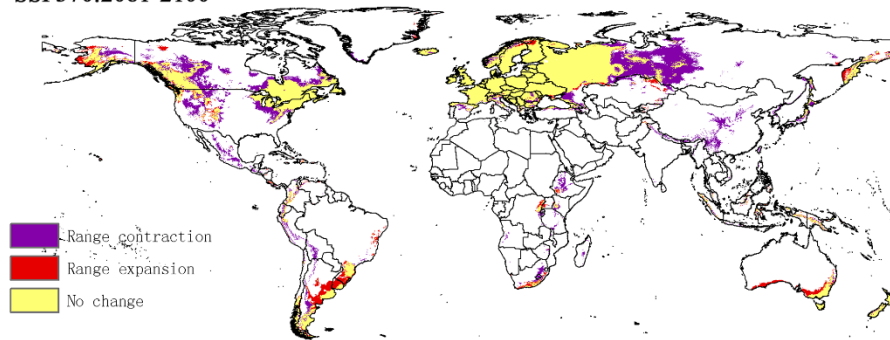

Supplementary Figure 5 The change of suitable distribution area of *P. bidens* under SSP370 climate scenario

SSP585:2021-2040

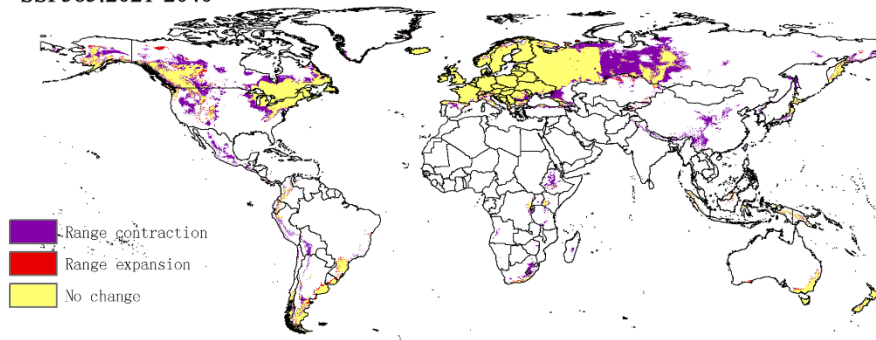

SSP585:2041-2060

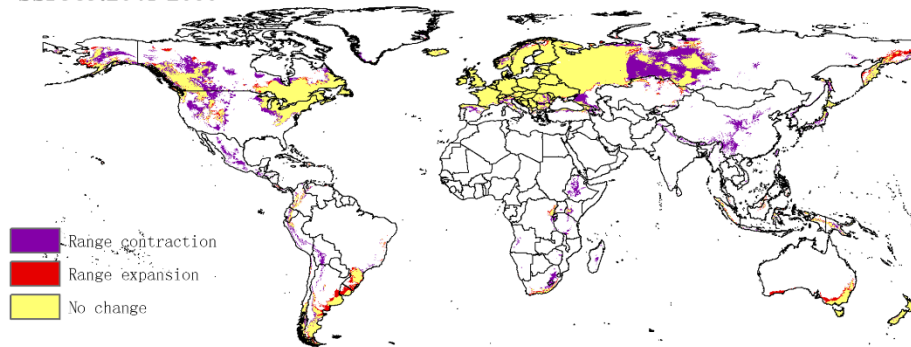

SSP585:2061-2080

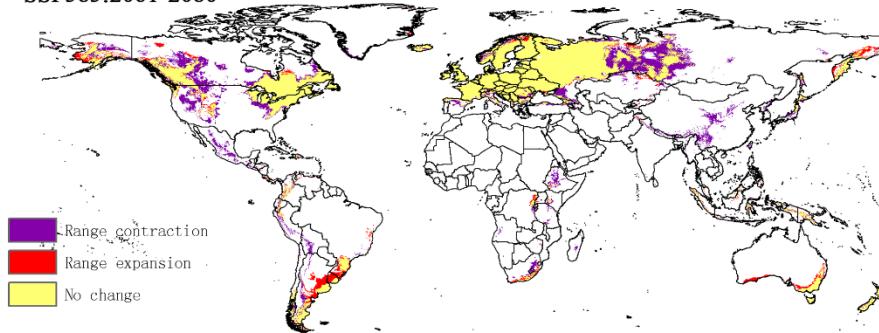

SSP585:2081-2100

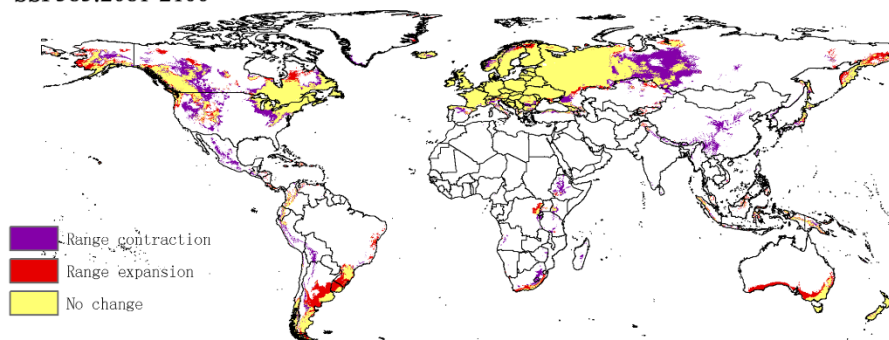

Supplementary Figure 6 The change of suitable distribution area of *P. bidens* under SSP585 climate scenario

SSP126:2020-2040

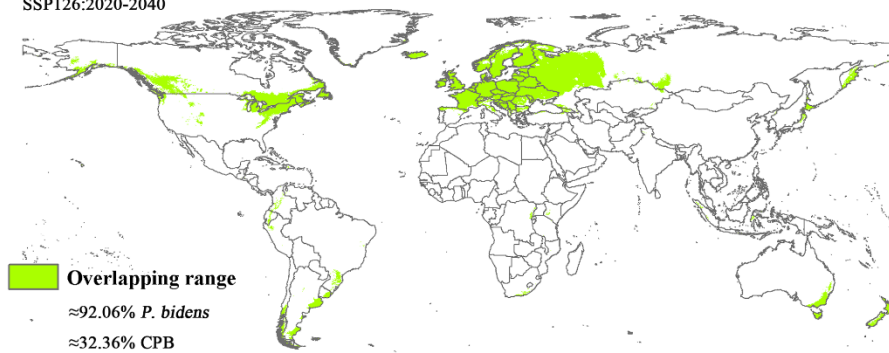

SSP126:2040-2060

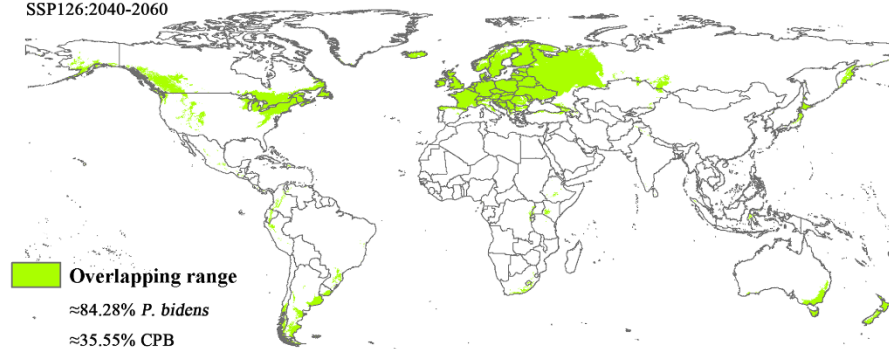

SSP126:2060-2080

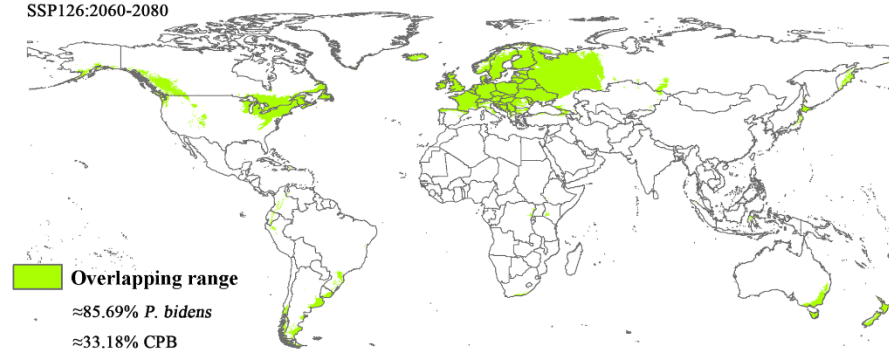

SSP126:2080-2100

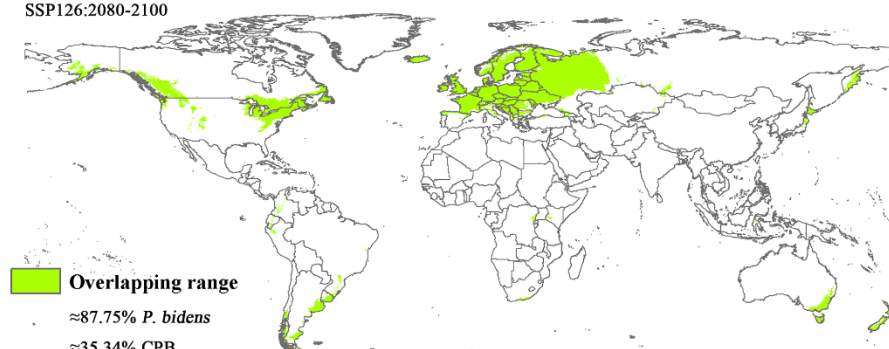

Supplementary Figure 7 Overlapping range in the suitable distribution area of CPB and *P. bidens* under SSP126 climate scenario

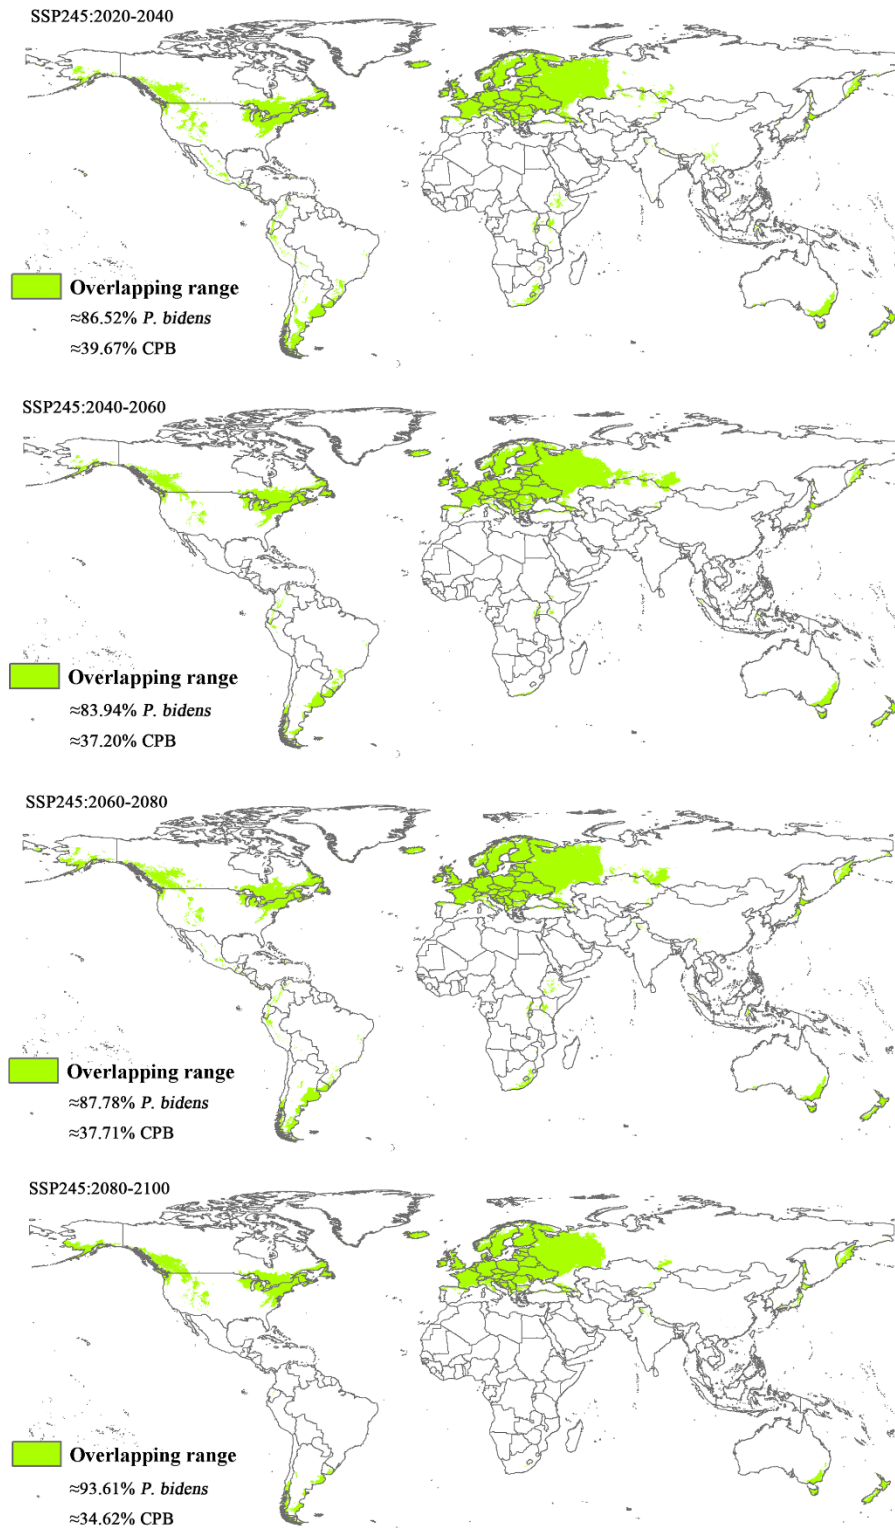

Supplementary Figure 8 Overlapping range in the suitable distribution area of CPB and *P. bidens* under SSP245 climate scenario



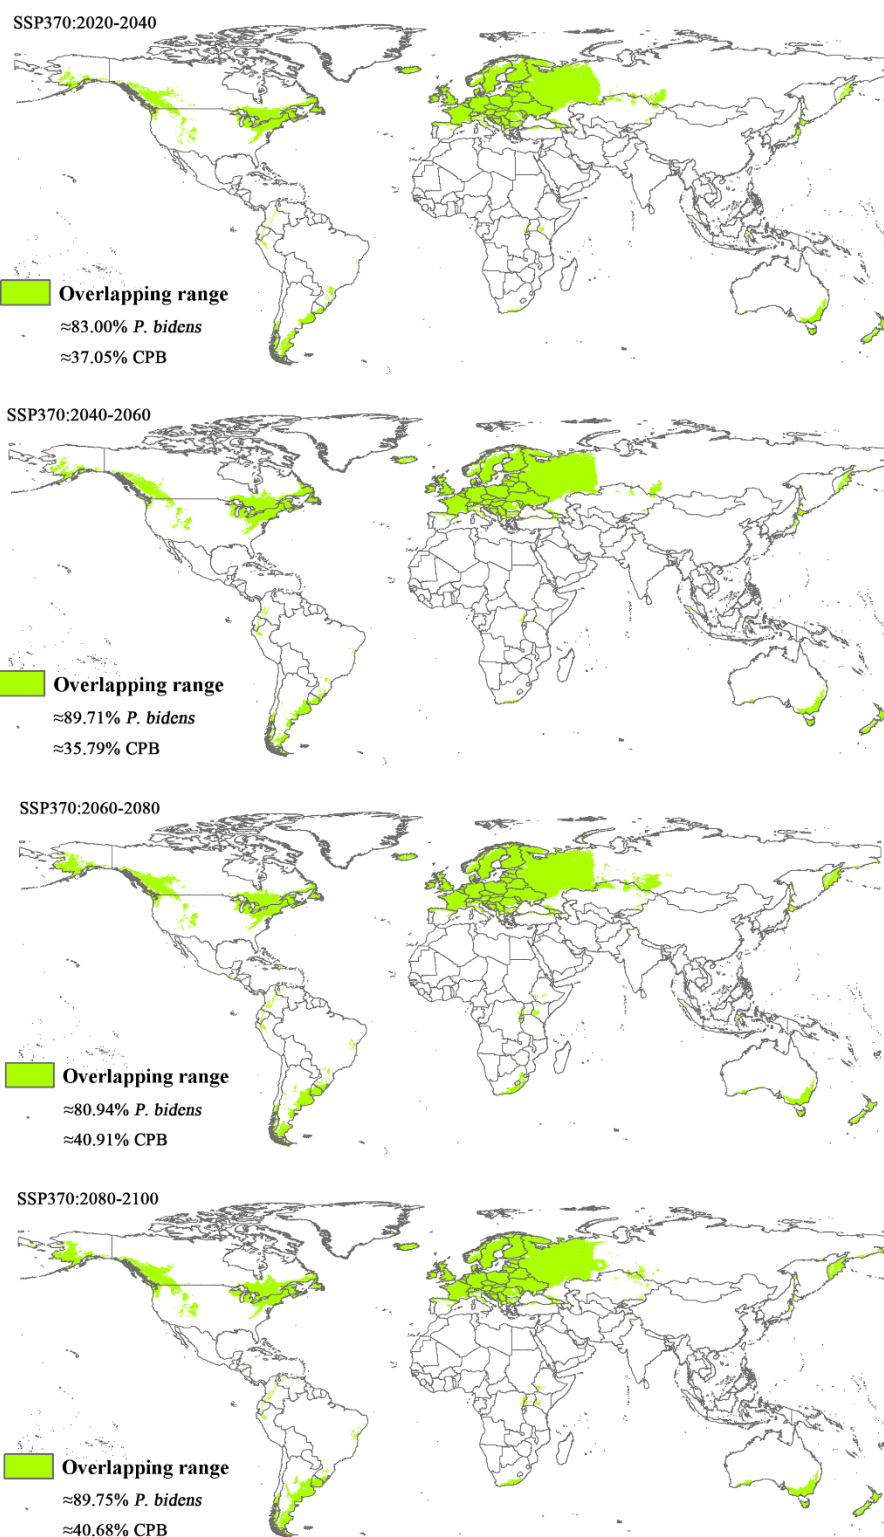

Supplementary Figure 9 Overlapping range in the suitable distribution area of CPB and *P. bidens* under SSP370 climate scenario

SSP585:2020-2040

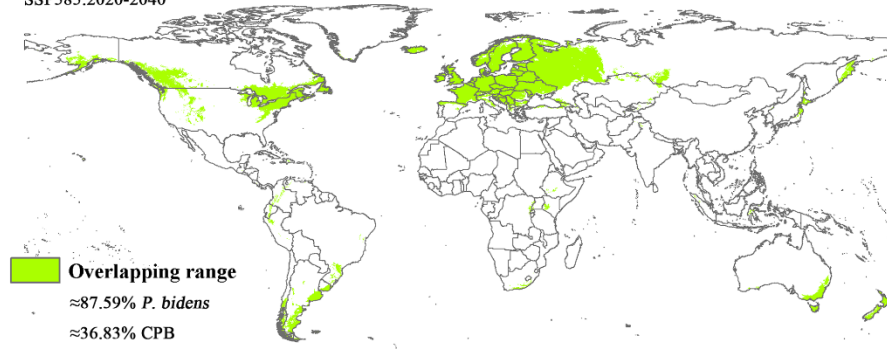

SSP585:2040-2060

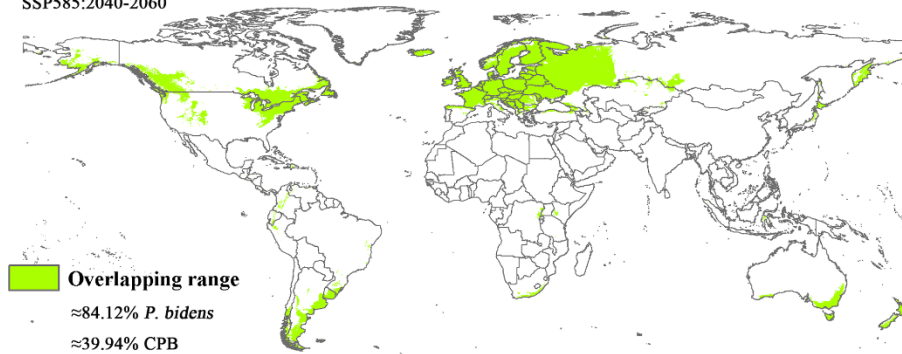

SSP585:2060-2080

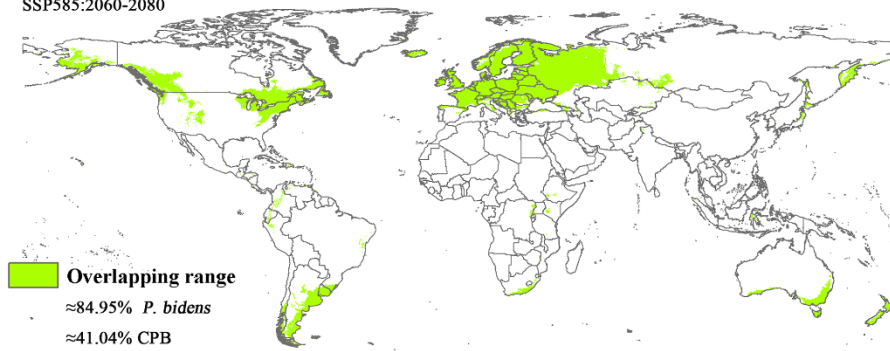

SSP585:2080-2100

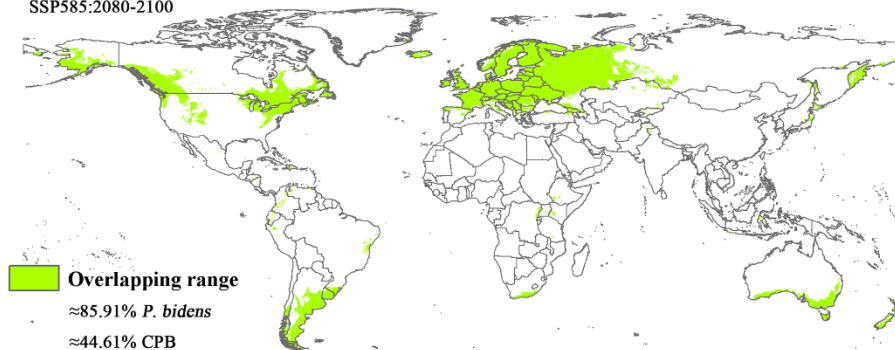

Supplementary Figure 10 Overlapping range in the suitable distribution area of CPB and *P. bidens* under SSP585 climate scenario
